# Supplementary material
Source: MDPI journal article supplement (https://www.mdpi.com/1999-4907/14/2/209)
Supplement: s1 [file s1]

**Table S1.** Effects of forestland conversion to tea plantations on soil physical and chemical properties.

| Soil depth /cm | Land-use types | Soil organic matter (g/kg soil) | Available N (mg/kg soil) | Available P (mg/kg soil) | Available K (mg/kg soil) | pH                 | Available Fe (mg/kg soil) | Exchangeable Ca (cmol/kg soil) | Soil bulk density (g/cm <sup>3</sup> soil) |
|----------------|----------------|---------------------------------|--------------------------|--------------------------|--------------------------|--------------------|---------------------------|--------------------------------|--------------------------------------------|
| 0-20 cm        | FDA            | 52.00±1.57aA                    | 122.33 ±5.51bA           | 3.30 ±1.27bA             | 91.33±11.71aA            | 4.47±0.05aA        | 81.97±5.25bA              | 0.77±0.16aA                    | 0.92±0.08cB                                |
|                | ZC3A           | 14.07 ±3.58cA                   | 78.00 ±14.01cA           | 2.97±0.84bA              | 44.00±8.66 bA            | 4.37±0.05aA        | 5.53±0.85cA               | 0.54±0.09bA                    | 1.20±0.06aA                                |
|                | ZC30A          | 37.03±4.43bA                    | 186.67 ±11.59aA          | 112.00±7.81aA            | 50.33±5.13 bA            | 3.77±0.15bA        | 268.90±32.18aA            | 0.48 ±0.24bA                   | 1.10±0.06bA                                |
| 20-40 cm       | FDB            | 27.40±1.67aB                    | 104.02 ±11.15aA          | 2.03±0.93bA              | 48.67±4.73aB             | 4.57±0.12aA        | 14.60 ±1.05bB             | 0.45±0.17aB                    | 1.12±0.06abA                               |
|                | ZC3B           | 10.13 ±1.65cA                   | 73.67 ±10.78bA           | 2.63±0.83bA              | 54.01±11.37aA            | 4.39±0.15aA        | 5.40±1.83cA               | 0.55±0.12aA                    | 1.22±0.04aA                                |
|                | ZC30B          | 21.47±4.11bB                    | 129.00±26.21aB           | 16.00±5.89aB             | 45.00±8.54aA             | 3.97±0.20bA        | 67.97±16.83aB             | 0.23±0.07bB                    | 1.11±0.03bA                                |
| Land-use(L)    |                | 121.57**                        | 55.42**                  | 453.29**                 | 2.26 <sup>NS</sup>       | 18.13**            | 74.11**                   | 3.37 <sup>NS</sup>             | 17.62**                                    |
| Depth(D)       |                | 101.46**                        | 40.51**                  | 287.59**                 | 2.25 <sup>NS</sup>       | 1.17 <sup>NS</sup> | 62.35**                   | 4.83 <sup>NS</sup>             | 10.67*                                     |
| L×D            |                | 16.80**                         | 9.69**                   | 273.64**                 | 0.84 <sup>NS</sup>       | 0.39 <sup>NS</sup> | 27.12**                   | 1.44 <sup>NS</sup>             | 5.85*                                      |

Note: Values are given as means ± standard deviation (n=3). Letters A and B under the “Land-use ” column indicate sampled depths of 0-20 cm and 20-40 cm, respectively. Different lowercase letters indicate significant differences between different soil samples at the same sampled soil depth ( $p<0.05$ ) whereas different capital letters indicate significant differences between the same soil type at different sampled depths ( $p<0.05$ ). \*,  $p<0.05$ . \*\*,  $p<0.01$ . NS, not significant. The same below.

**Table S2.** Primer sets and thermal profiles used in PCR amplification.

| Primer | Sequence (5'-3')      | PCR conditions                                                                                                                                  |
|--------|-----------------------|-------------------------------------------------------------------------------------------------------------------------------------------------|
| ITS1F  | CTTGGTCATTAGAGGAAGTAA | initial denaturation at 95°C for 3 min; 35 cycles of 30 s at 95°C, 30 s at 55°C, and 45 s at 72 °C; and a final extraction at 72 °C for 10 min. |
| ITS2R  | GCTGCGTTCTTCATCGATGC  |                                                                                                                                                 |

**Table S3.** Key species in soil fungal network under different land use

| OTU     | Phylum                | Order                 | genus                 | Land-use types | degree |
|---------|-----------------------|-----------------------|-----------------------|----------------|--------|
| OTU525  | unclassified_k__Fungi | unclassified_k__Fungi | unclassified_k__Fungi | FD             | 34     |
| OTU2716 | Ascomycota            | Hypocreales           | Trichoderma           | FD             | 34     |
| OTU2686 | Mortierellomycota     | Mortierellales        | Mortierella           | FD             | 34     |

|         |                      |                                    |                                    |      |    |
|---------|----------------------|------------------------------------|------------------------------------|------|----|
| OTU962  | Ascomycota           | Pleosporales                       | unclassified_o_Pleosporales        | FD   | 34 |
| OTU457  | Ascomycota           | Hypocreales                        | Ilyonectria                        | FD   | 34 |
| OTU149  | Ascomycota           | Hypocreales                        | Paecilomyces                       | FD   | 34 |
| OTU63   | Ascomycota           | Archaeorhizomycetales              | Archaeorhizomyces                  | FD   | 34 |
| OTU760  | Ascomycota           | unclassified_c_Archaeorhizomycetes | unclassified_c_Archaeorhizomycetes | FD   | 33 |
| OTU53   | Ascomycota           | Pleosporales                       | Paraboeremia                       | FD   | 32 |
| OTU2493 | Ascomycota           | unclassified_c_Archaeorhizomycetes | unclassified_c_Archaeorhizomycetes | FD   | 32 |
| OTU2463 | Ascomycota           | Eurotiales                         | Sagenomella                        | ZC3  | 36 |
| OTU2422 | Basidiomycota        | unclassified_p_Basidiomycota       | unclassified_p_Basidiomycota       | ZC3  | 37 |
| OTU1809 | Ascomycota           | Orbiliiales                        | Dactylella                         | ZC3  | 37 |
| OTU2458 | Ascomycota           | Annulatascales                     | unclassified_o_Annulatascales      | ZC3  | 36 |
| OTU2468 | Ascomycota           | Sordariales                        | Dendrosporium                      | ZC3  | 36 |
| OTU989  | unclassified_k_Fungi | unclassified_k_Fungi               | unclassified_k_Fungi               | ZC3  | 36 |
| OTU2563 | Ascomycota           | unclassified_p_Ascomycota          | unclassified_p_Ascomycota          | ZC3  | 36 |
| OTU2562 | Ascomycota           | unclassified_p_Ascomycota          | unclassified_p_Ascomycota          | ZC3  | 30 |
| OTU2032 | Glomeromycota        | unclassified_p_Glomeromycota       | unclassified_p_Glomeromycota       | ZC3  | 33 |
| OTU2582 | Glomeromycota        | unclassified_p_Glomeromycota       | unclassified_p_Glomeromycota       | ZC3  | 33 |
| OTU2661 | Ascomycota           | unclassified_p_Ascomycota          | unclassified_p_Ascomycota          | ZC30 | 34 |
| OTU1019 | Basidiomycota        | unclassified_p_Basidiomycota       | unclassified_p_Basidiomycota       | ZC30 | 34 |
| OTU2063 | Mortierellomycota    | Mortierellales                     | Mortierella                        | ZC30 | 34 |
| OTU1580 | Mortierellomycota    | Mortierellales                     | Mortierella                        | ZC30 | 34 |
| OTU1983 | Ascomycota           | Hypocreales                        | Trichoderma                        | ZC30 | 34 |
| OTU15   | Rozellomycota        | unclassified_p_Rozellomycota       | unclassified_p_Rozellomycota       | ZC30 | 34 |
| OTU1398 | unclassified_k_Fungi | unclassified_k_Fungi               | unclassified_k_Fungi               | ZC30 | 34 |
| OTU1355 | unclassified_k_Fungi | unclassified_k_Fungi               | unclassified_k_Fungi               | ZC30 | 33 |
| OTU1232 | unclassified_k_Fungi | unclassified_k_Fungi               | unclassified_k_Fungi               | ZC30 | 32 |

|         |                      |                      |                      |      |    |
|---------|----------------------|----------------------|----------------------|------|----|
| OTU1352 | unclassified_k_Fungi | unclassified_k_Fungi | unclassified_k_Fungi | ZC30 | 32 |
|---------|----------------------|----------------------|----------------------|------|----|

Note: Top ten nodes with the highest degree, highest closeness centrality, and lowest betweenness centrality were selected as the keystone taxa.

**Table S4.** Effects of forestland conversion to tea plantations on soil fungal trophic modes.

| Soil depth/cm | Land-use types | P                   | S                   | Sy                   | P-S                 | S-Sy                 | P-S-Sy              | P-Sy                |
|---------------|----------------|---------------------|---------------------|----------------------|---------------------|----------------------|---------------------|---------------------|
| 0-20 cm       | FDA            | 7.43±2.20Ab         | 74.59±6.71Aa        | 11.86±4.07Ab         | 4.18±2.08Ab         | 1.52±0.99Ba          | 0.28±0.16Aa         | 0.1±0.06Aa          |
|               | ZC3A           | 7.45±2.05Ab         | 50.11±9.98Aab       | 36.09±8.66a          | 1.53±0.93b          | 3.88±2.55Aa          | 0.87±0.28Aa         | 0.02±0.02Aa         |
|               | ZC30A          | 18.37±5.43Aa        | 43.19±15.74b        | 2.02±2.02Bb          | 29.74±31.14Aa       | 1.92±1.41Aa          | 1.41±1.31a          | 3.31±2.9Aa          |
| 20-40 cm      | FDB            | 7.23±3.18Aa         | 56.78±6.03Ab        | 9.93±1.8Ab           | 2.00±0.76Aa         | 22.46±9.53Aa         | 0.39±0.37Aa         | 1.17±1.02Aa         |
|               | ZC3B           | 5.49±7.02Aa         | 59.03±12.67Ab       | 32.82±3.79Aa         | 0.44±0.48Ab         | 1.86±1.72Ab          | 0.26±0.33Aa         | 0.06±0.05Ab         |
|               | ZC30B          | 6.45±2.72Ba         | 79.25±5.26Aa        | 7.93±1.7Ab           | 1.79±0.77Aab        | 1.41±0.63Ab          | 0.41±0.26Aa         | 2.72±1.49Aa         |
| Land-use (L)  |                | 3.516 <sup>NS</sup> | 1.09 <sup>NS</sup>  | 75.235 <sup>**</sup> | 2.357 <sup>NS</sup> | 11.06 <sup>**</sup>  | 1.393 <sup>NS</sup> | 1.746 <sup>NS</sup> |
| Depth(D)      |                | 5.646 <sup>*</sup>  | 2.145 <sup>NS</sup> | 0.013 <sup>NS</sup>  | 2.993 <sup>NS</sup> | 9.808 <sup>**</sup>  | 3.122 <sup>NS</sup> | 2.552 <sup>NS</sup> |
| L×D           |                | 3.409 <sup>NS</sup> | 6.325 <sup>*</sup>  | 1.905 <sup>NS</sup>  | 2.13 <sup>NS</sup>  | 14.309 <sup>**</sup> | 1.317 <sup>NS</sup> | 1.714 <sup>NS</sup> |

Note: P: pathotroph; S: saprotroph, Sy: symbiotroph, S-Sy: saprotroph-symbiotroph, P-Sy: pathotroph-symbiotroph, P-S: pathotroph-saprotroph ; P-S-Sy: pathotroph-saprotroph-symbiotroph.

**Table S5.** Effects of forestland conversion to tea plantations on soil fungal functional groups (guilds).

| Trophic                           | Guild                                                                                       | Land-use (L)        | Depth(D)            | L×D                 |
|-----------------------------------|---------------------------------------------------------------------------------------------|---------------------|---------------------|---------------------|
| pathotroph                        | animal pathogen                                                                             | 2.862 <sup>NS</sup> | 2.169 <sup>NS</sup> | 0.636 <sup>NS</sup> |
|                                   | plant pathogen                                                                              | 0.524 <sup>NS</sup> | 4.68 <sup>NS</sup>  | 2.114 <sup>NS</sup> |
|                                   | fungus parasite                                                                             | 2.508 <sup>NS</sup> | 2.033 <sup>NS</sup> | 2.493 <sup>NS</sup> |
| saprotroph                        | soil saprotroph                                                                             | 10.038**            | 15.758**            | 6.321**             |
|                                   | undefined saprotroph                                                                        | 0.997 <sup>NS</sup> | 5.488*              | 4.994*              |
| symbiotroph                       | arbuscular mycorrhizal                                                                      | 56.567**            | 3.293 <sup>NS</sup> | 2.589 <sup>NS</sup> |
| pathotroph-saprotroph             | animal pathogen-endophyte-lichen parasite-plant pathogen-soil saprotroph-wood saprotroph    | 22.101**            | 0.237 <sup>NS</sup> | 0.261 <sup>NS</sup> |
|                                   | animal pathogen-plant pathogen-soil saprotroph-undefined saprotroph                         | 8.207**             | 7.063*              | 7.458**             |
|                                   | animal pathogen-plant pathogen-undefined saprotroph                                         | 3.629 <sup>NS</sup> | 6.41*               | 1.166 <sup>NS</sup> |
|                                   | fungus parasite-plant pathogen-plant saprotroph                                             | 1.263 <sup>NS</sup> | 1.237 <sup>NS</sup> | 1.244 <sup>NS</sup> |
|                                   | bryophyte parasite-ectomycorrhizal-ericoid mycorrhizal-undefined saprotroph-wood saprotroph | 14.369**            | 3.178 <sup>NS</sup> | 4.443*              |
| saprotroph-symbiotroph            | ectomycorrhizal-fungus parasite-soil saprotroph-undefined saprotroph                        | 1.166 <sup>NS</sup> | 1.62 <sup>NS</sup>  | 1.20 <sup>NS</sup>  |
|                                   | endophyte-litter saprotroph-soil saprotroph-undefined saprotroph                            | 0.096 <sup>NS</sup> | 4.018 <sup>NS</sup> | 4.199 <sup>NS</sup> |
|                                   | endophyte-litter saprotroph-wood saprotroph                                                 | 8.067**             | 0.907 <sup>NS</sup> | 0.578 <sup>NS</sup> |
| pathotroph-saprotroph-symbiotroph | endophyte-soil saprotroph                                                                   | 9.665**             | 10.709**            | 10.619**            |
|                                   | fungus parasite-undefined saprotroph                                                        | 0.445 <sup>NS</sup> | 13.626**            | 1.434 <sup>NS</sup> |

**Table S6.** Pearson correlations between soil properties and fungal alpha diversity.

| Diversity index | SOM    | AN       | AP       | AK       | pH     | AF <sub>e</sub> | AC <sub>a</sub> | BK       |
|-----------------|--------|----------|----------|----------|--------|-----------------|-----------------|----------|
| Sobs            | 0.264  | 0.617**  | 0.629**  | -0.716** | -0.174 | 0.572*          | 0.181           | -0.600** |
| Shannon         | 0.226  | 0.738**  | 0.751**  | -0.743** | 0.082  | 0.490*          | 0.351           | -0.683** |
| Simpson         | -0.130 | -0.725** | -0.733** | 0.672**  | -0.265 | -0.402          | -0.409          | 0.585*   |
| ACE             | 0.234  | 0.681**  | 0.691**  | -0.754** | -0.141 | 0.563*          | 0.238           | -0.668** |

|       |      |         |         |          |       |       |        |          |
|-------|------|---------|---------|----------|-------|-------|--------|----------|
| Chao1 | 0.02 | 0.992** | 0.991** | -0.881** | 0.322 | 0.178 | 0.568* | -0.735** |
|-------|------|---------|---------|----------|-------|-------|--------|----------|

Note: SOM, Soil organic matter. AN, available N. AP, available P. AK, available K. AFe, available Fe. ACa, exchangeable calcium. BK, soil bulk density. \*,  $p < 0.05$ . \*\*,  $p < 0.01$ . The same below.

**Table S7.** Correlations between soil fungal community and soil properties.

| Factors | phylum         |          | genus          |          |
|---------|----------------|----------|----------------|----------|
|         | R <sup>2</sup> | P-values | R <sup>2</sup> | P-values |
| AN      | 0.478          | 0.01     | 0.5848         | 0.001    |
| AP      | 0.2069         | 0.162    | 0.3663         | 0.045    |
| AK      | 0.4233         | 0.012    | 0.2794         | 0.091    |
| pH      | 0.2791         | 0.082    | 0.2854         | 0.084    |
| ACa     | 0.367          | 0.042    | 0.1062         | 0.45     |
| BK      | 0.2584         | 0.101    | 0.4779         | 0.012    |

**Table S8.** Pearson correlations between soil properties and fungal trophic modes.

| Parameter                         | SOM      | AN       | AP      | AK     | pH      | AFe      | ACa    | BK     |
|-----------------------------------|----------|----------|---------|--------|---------|----------|--------|--------|
| pathogen                          | 0.334    | 0.403    | 0.750** | 0.196  | -0.417  | 0.781**  | -0.155 | -0.103 |
| saprotroph                        | 0.166    | 0.161    | -0.414  | -0.006 | 0.032   | -0.186   | 0.106  | -0.209 |
| symbiotroph                       | -0.650** | -0.720** | -0.534* | -0.04  | 0.396   | -0.644** | 0.182  | 0.495* |
| pathotroph-saprotroph             | 0.283    | 0.351    | 0.705** | -0.01  | -0.393  | 0.568*   | -0.175 | -0.248 |
| saprotroph-symbiotroph            | -0.042   | -0.136   | -0.23   | -0.002 | 0.429   | -0.279   | -0.05  | 0.111  |
| pathotroph-saprotroph-symbiotroph | 0.097    | 0.172    | 0.530*  | -0.111 | -0.472* | 0.604**  | 0.019  | 0.184  |
| pathotroph-symbiotroph            | 0.116    | 0.33     | 0.608** | -0.129 | -0.575* | 0.542*   | -0.205 | 0.015  |

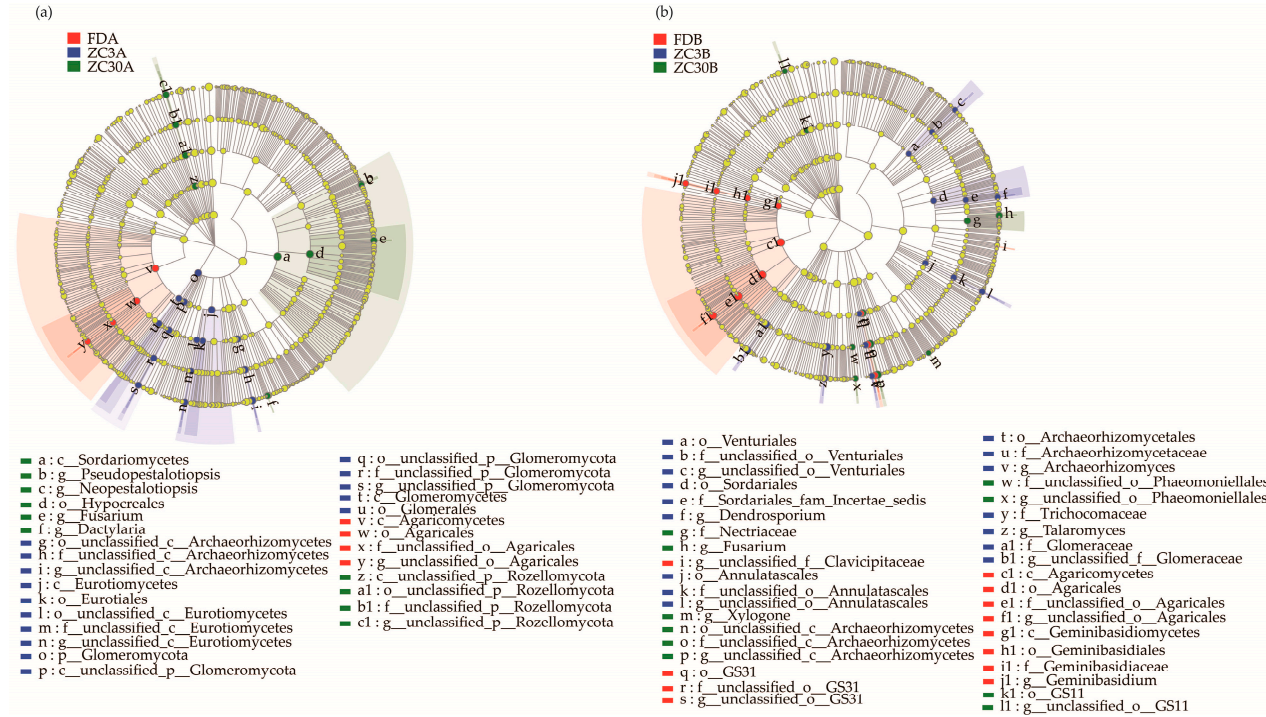

**Figure S1.** LEfSe indicating differences in the fungal taxa among forestland and tea garden samples. Different colored bars indicate taxa were enrichment among forestland and tea garden samples.

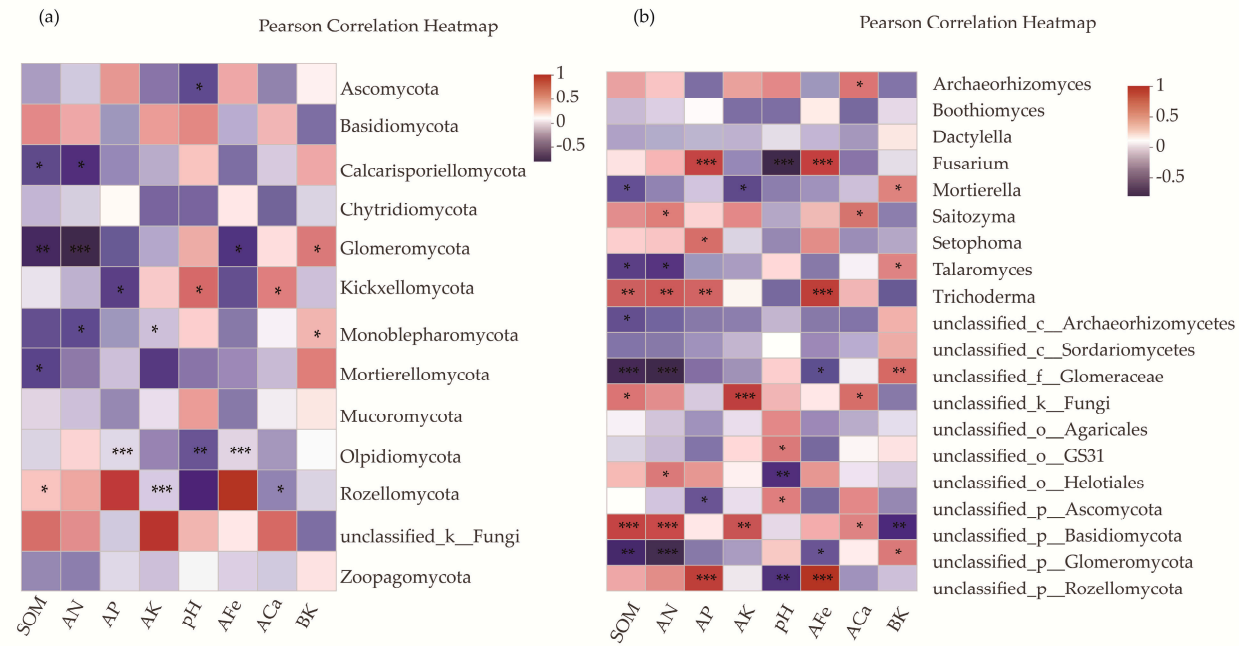

**Figure S2.** Pearson correlations between soil properties and abundant fungal phyla (a) or fungal genera (b).
